# Supplementary material
Source: PubMed Central journal article supplement (PMC7382985)

# Supplementary Figure 1

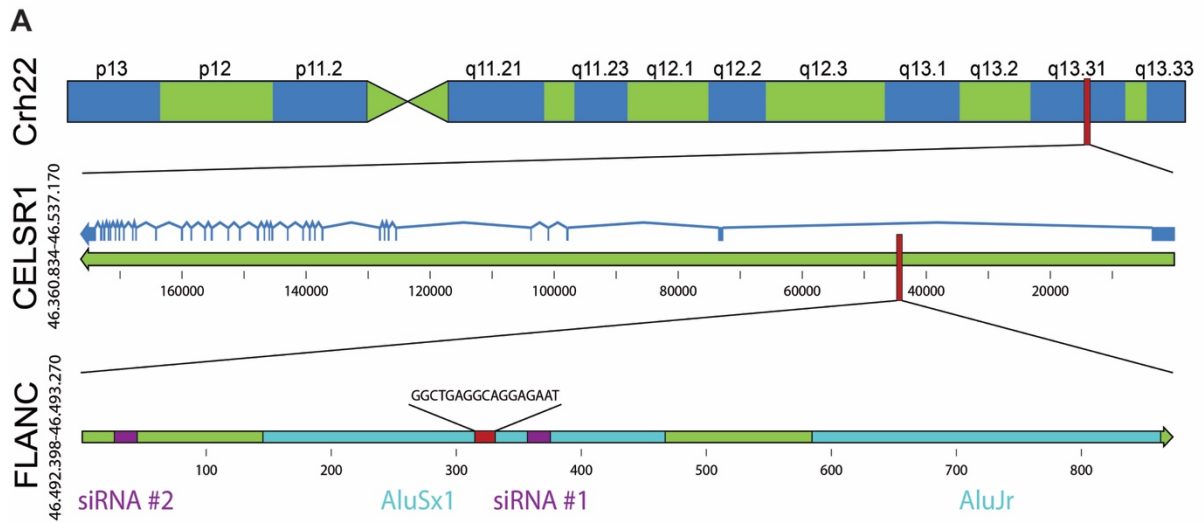

**B** FLANC orientation

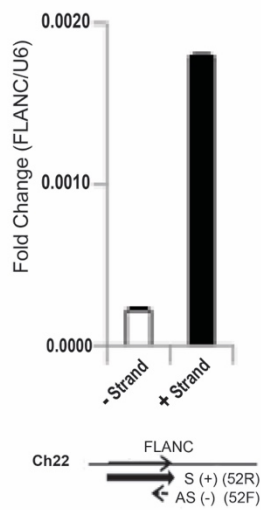

**C** FLANC expression in CRC cell lines

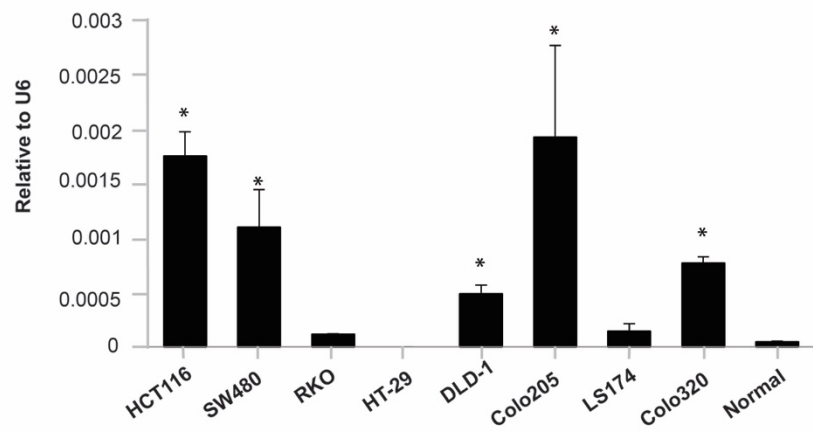

**D** FLANC expression in healthy human organs

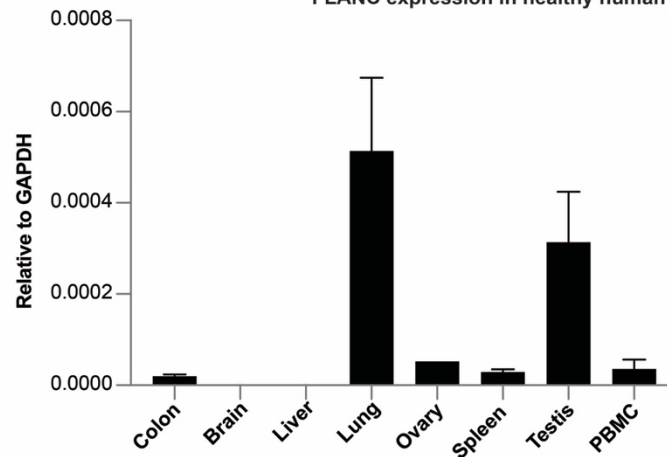

## Supplementary Figure 2

A

>FLANC  
length=873 nts / chr 22 (+) 46492398-46493270 (GRCh38/hg38)

```

GTCTTTCTGG CCAATTTC ACCAGGGACA GAAATTACCT CTTTTTCTT 46492447
TTCCATAAAA ATGCACCCCT TTGTTTTAAA AACTGGTAGC TTGTGTTATT 46492497
CCCACCTGGA TATATATTCT TCCAGATTAG AACAGGCTC TTGGGGCCAG 46492547
GCGCAGTGGC TCACGCCTGT AAACCCAGCA CTTTGGGAGG CTGAGGCAGG 46492597
CAGATCACCT GAAATCAGGA GTTCAAGACT AGCCTGGCCA ACATGGTGAA 46492647
ACCCCGTCTC TACTAAAAAT AACAAAAAT AGCTGGGCGT GTAAGCAATC 46492697
CCAGCTACTT GGGAGGCTGA GGCAGGAGAA TCGCTCGAGG CAAGATCCAC 46492747
CGTGCTCGGC CGAAACCCAG GAGGACAGTA GAGGTTGCCA ACAGTGAGCC 46492797
AAGATAGCCA AGATCATGCC ACTGCACTCC AGTTTGGGCG ACAGTGACTC 46492847
TCTGTCTCAG AAAAAACCA GTTCTTGGT AACAGGACAA AATATTAGAA 46492897
GGTAGACAAA AAGAGCATGG AAAACATTTA ATATTTCTCT GGGAGAGAAA 46492947
AAGTATGTAA GAGAACAGAC TAAACAAAGC ACGTGTCTAT AATCCCAGTG 46492997
CTTTGGGAAA CCGAGATGGG AGGATCGCTT GAGGCTGGGA ATTCCAGACC 46493047
AGCCTGGGAA ACATAGCCAG ATCCTATCTC TACAAAAAAT AAAAGTAAAA 46493097
AAATTAGCCA GGCATGGTGG CTCACACTTG TGGTCCCAGC TACTTGGGAG 46493147
GCTGAGGCAG GAAGATCAGT TGAGCCCAGG AGTTGGAGGC TGCAATGAGC 46493197
CATGATGGCA CCACTGCACT CCAGCCTGGG CAGCAGAAAA AGACCCTGAC 46493247
TCAAAAAATA AAAACAGGCG GGG 46493297
    
```

B

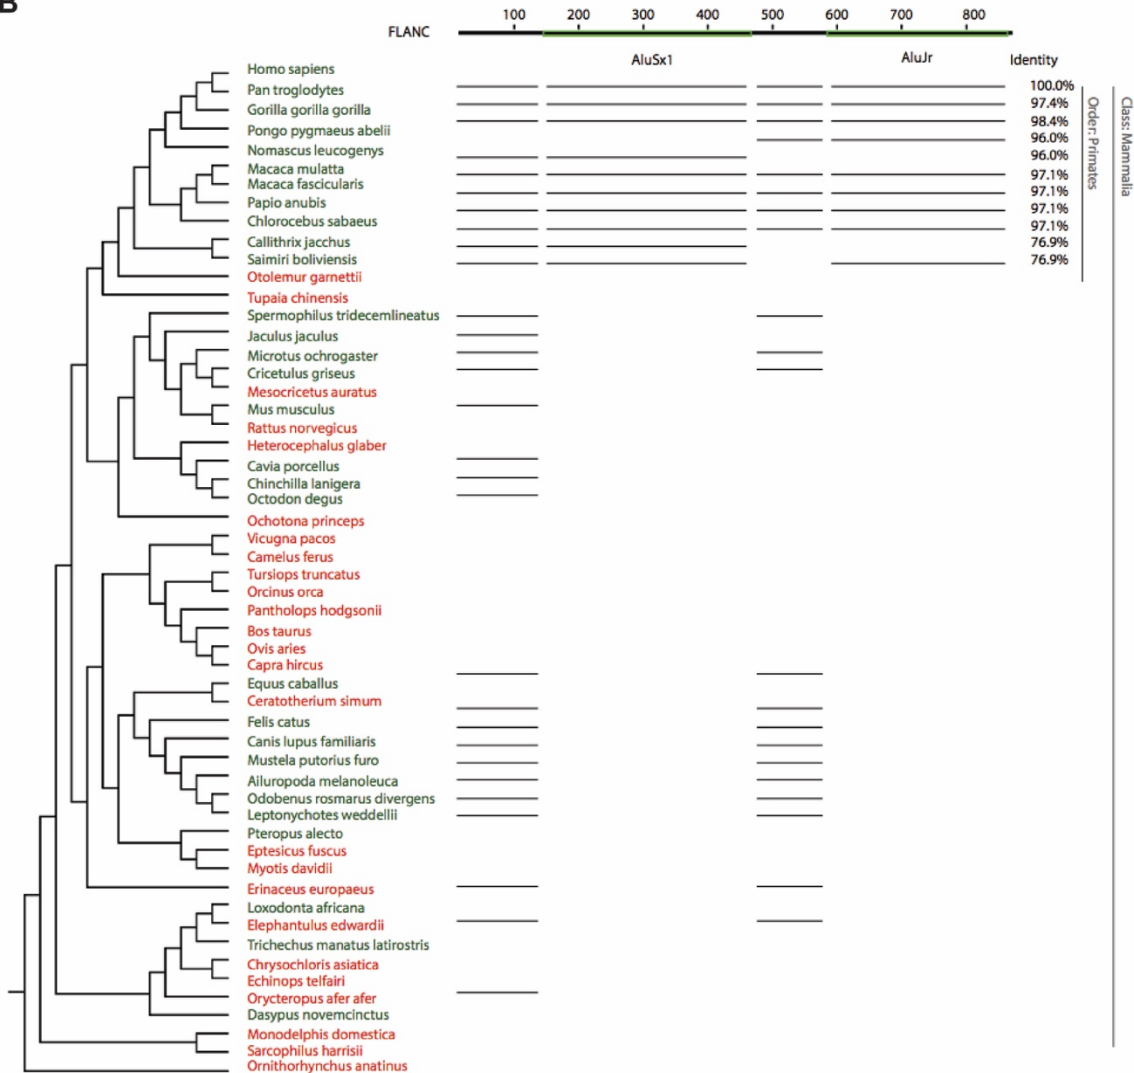

### Supplementary Figure 3

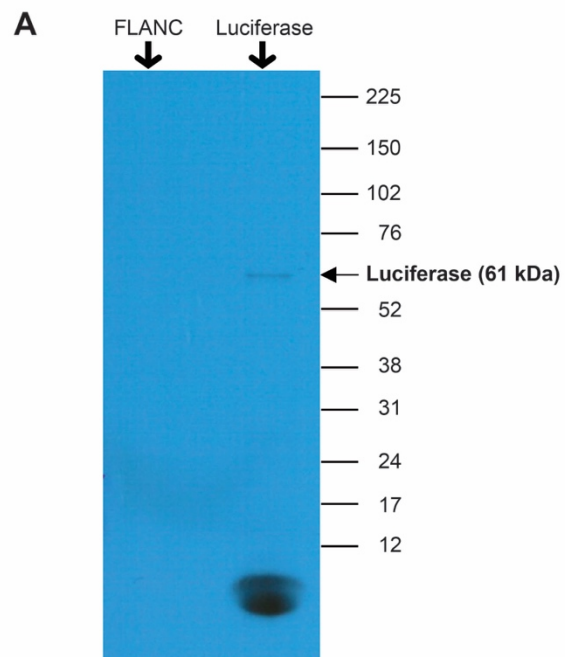

**B**

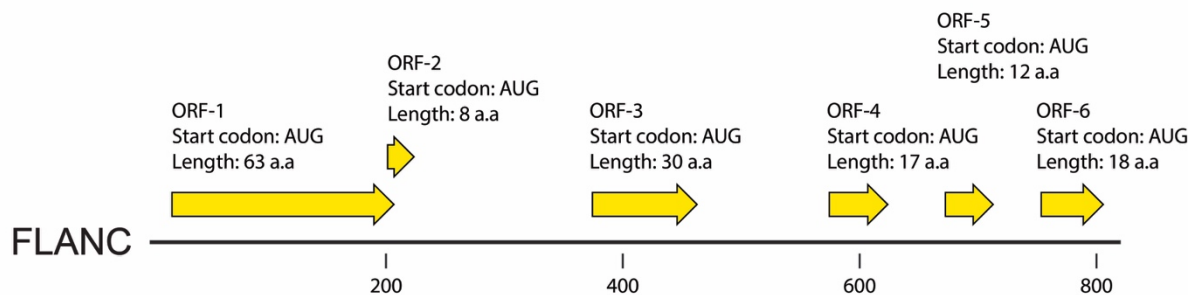

Supplementary Figure 4

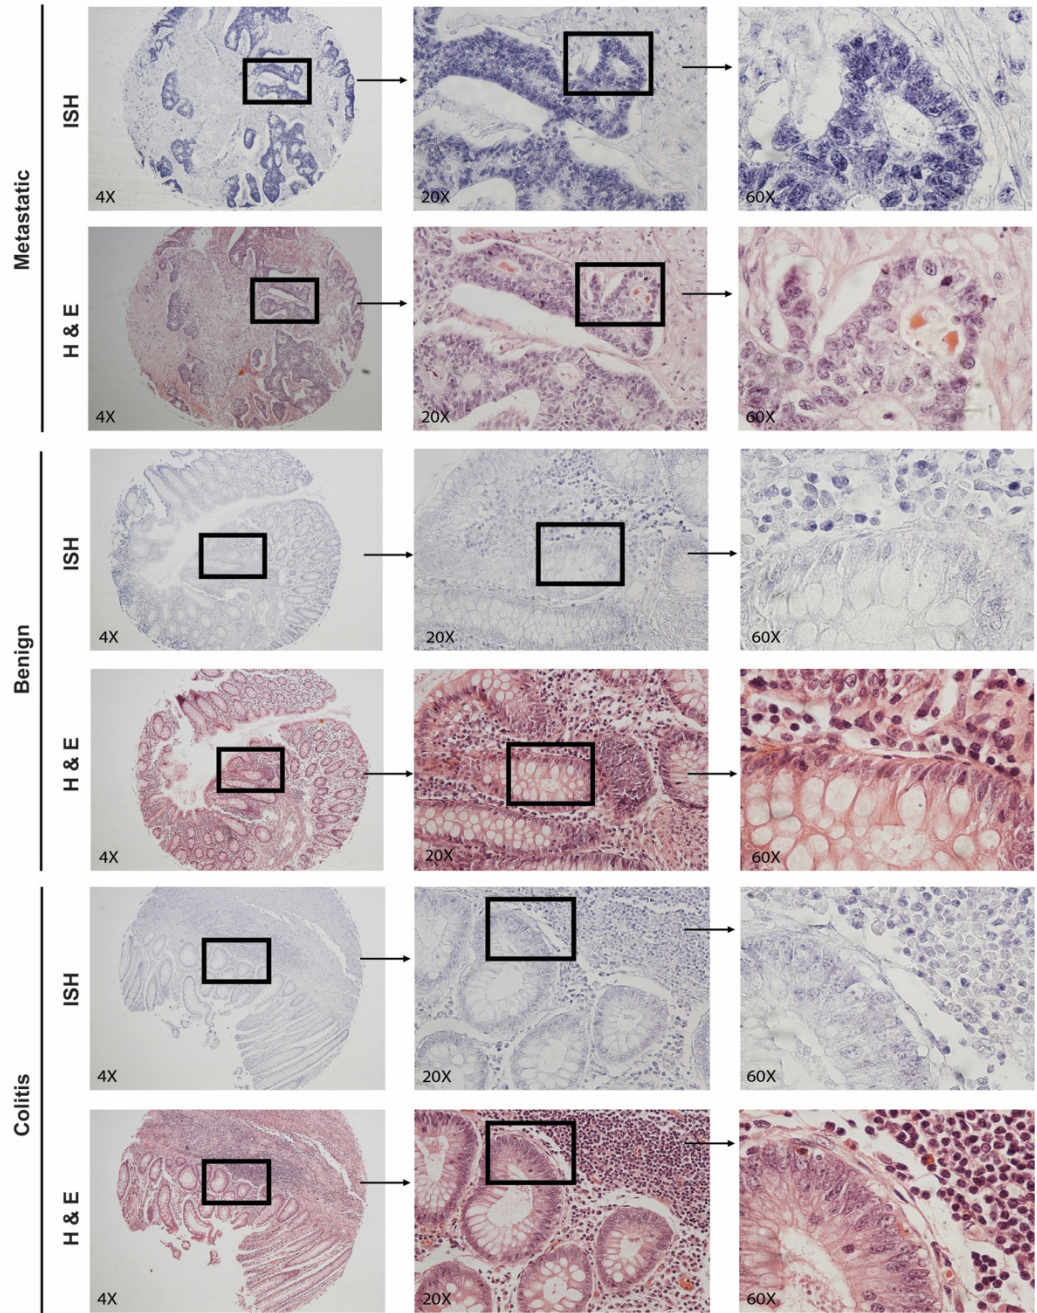



## Supplementary Figure 5

**A**

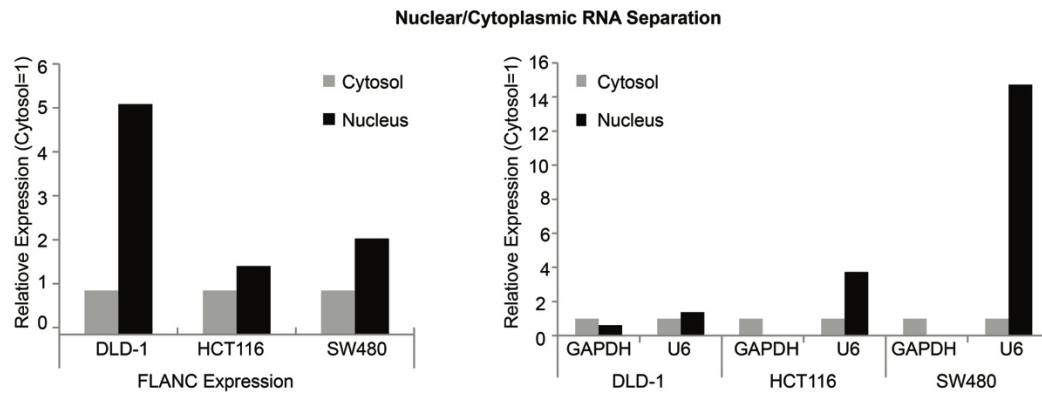

**B**

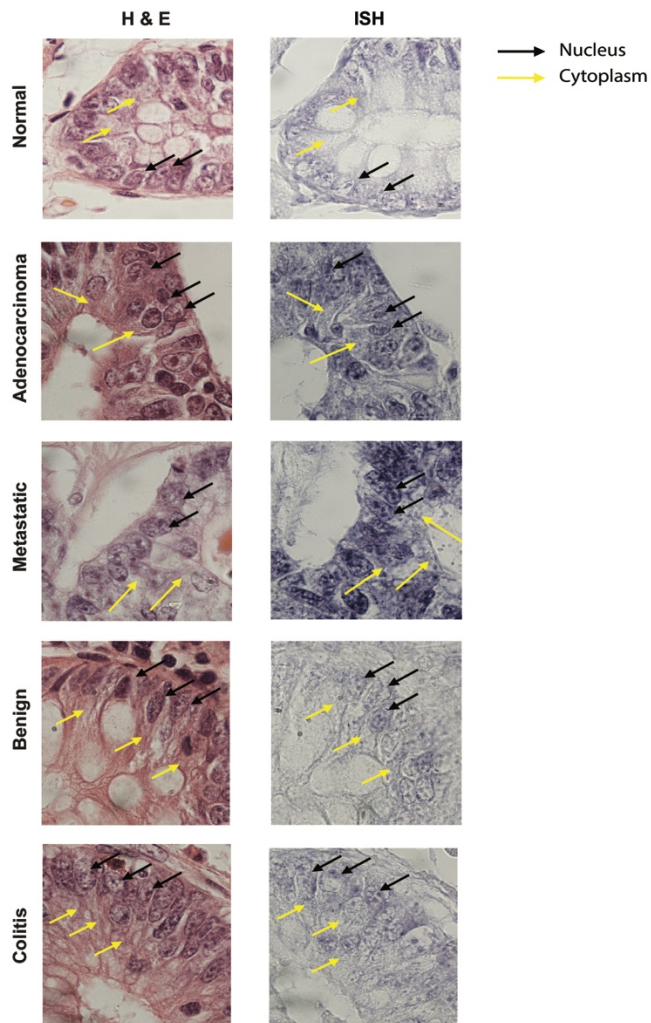

## Supplementary Figure 6

**A**

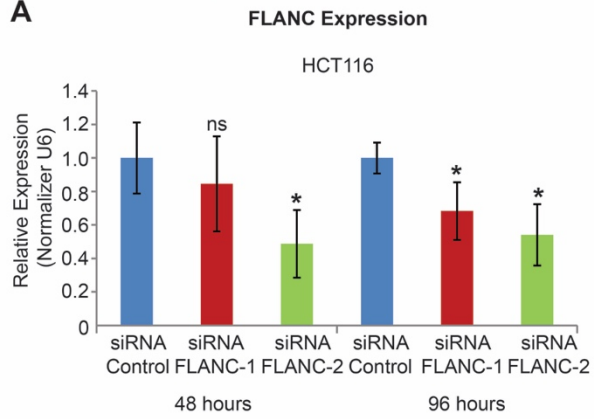

**B**

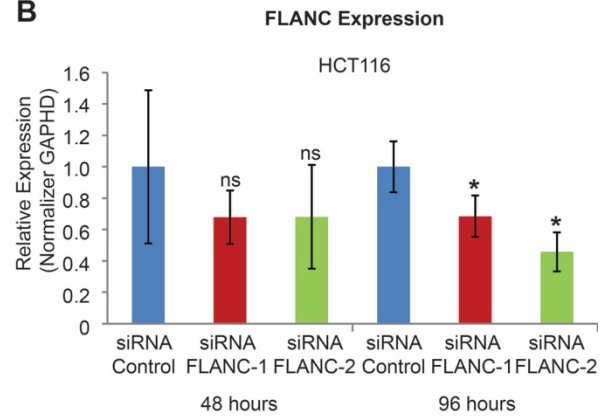

**C**

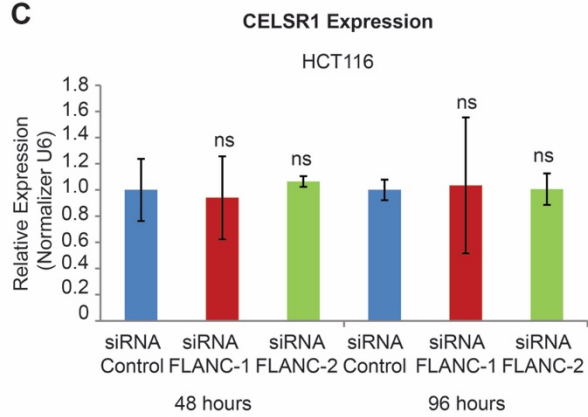

**D**

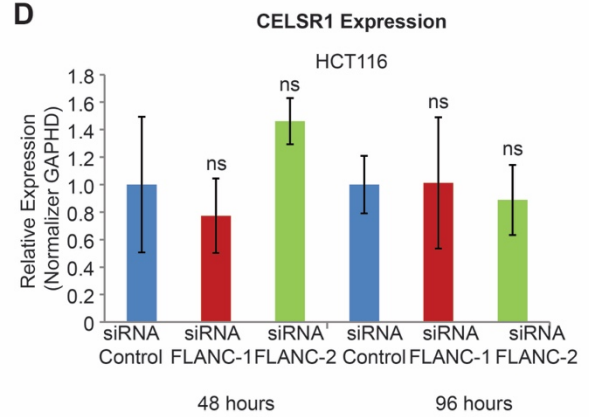

## Supplementary Figure 7

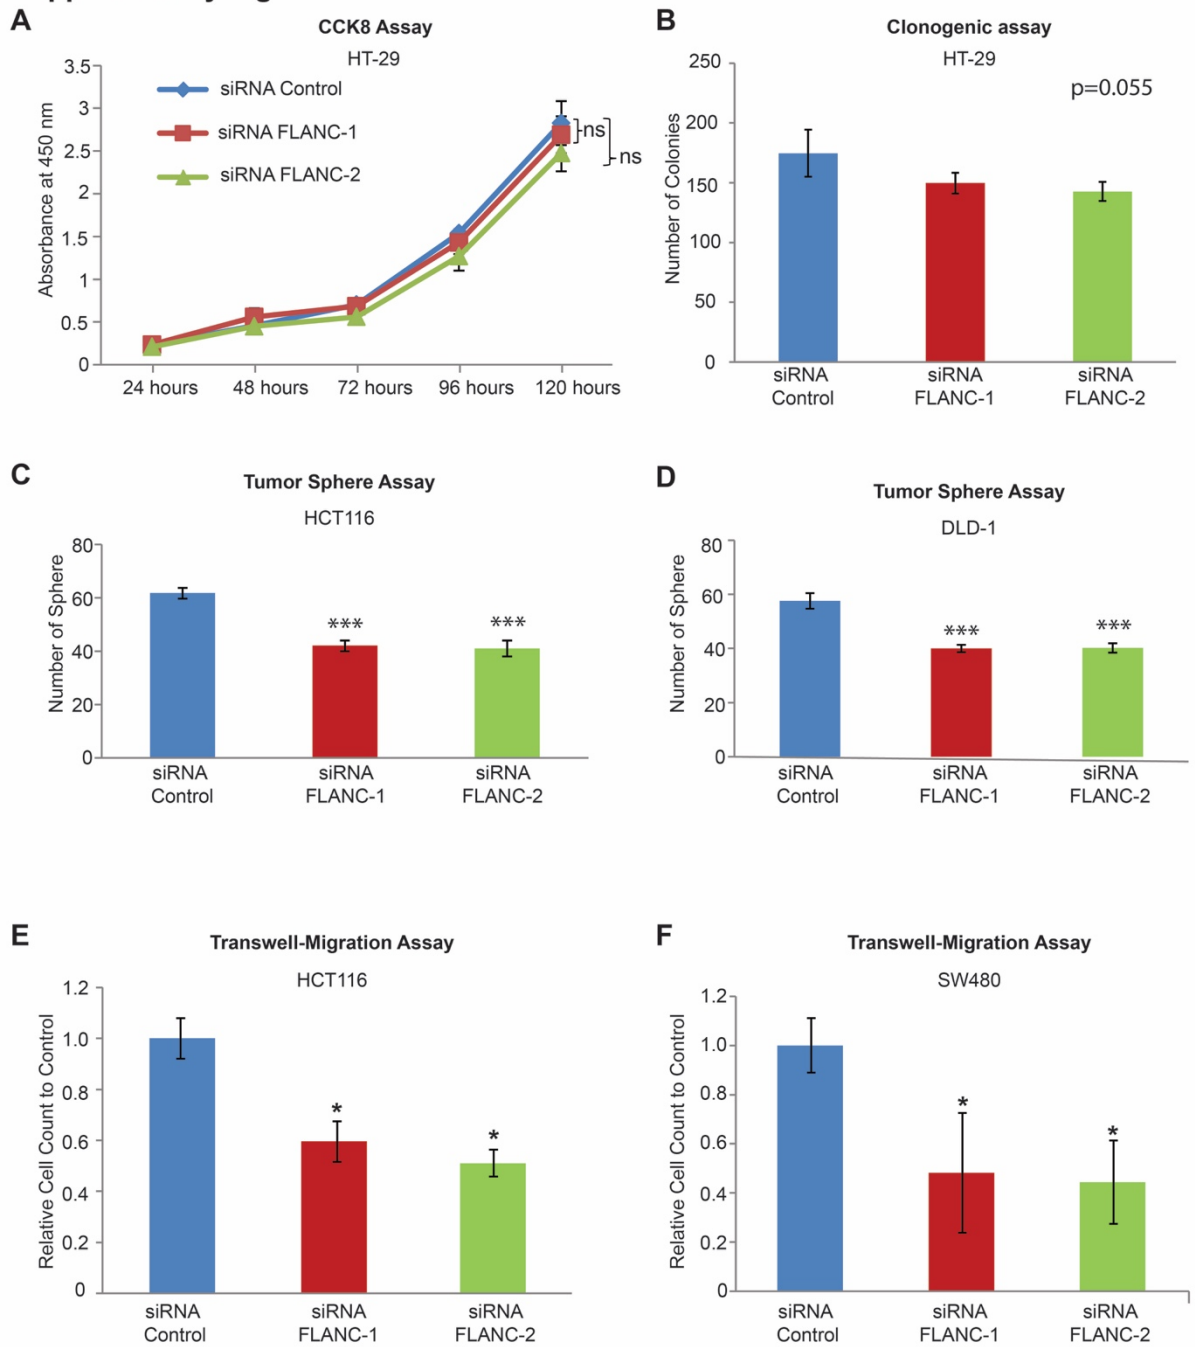

## Supplementary Figure 8

**A**

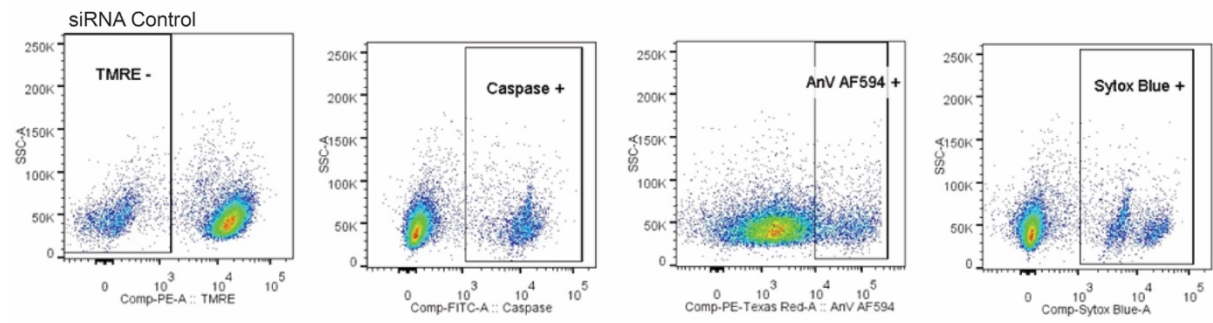

**B**

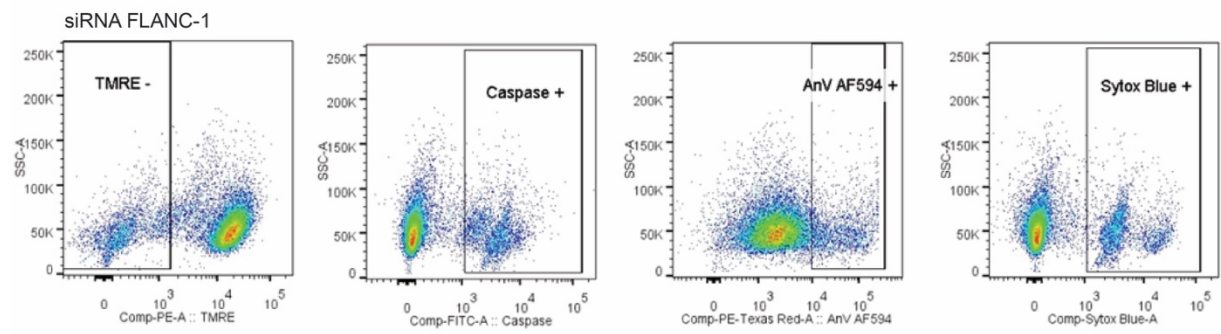

**C**

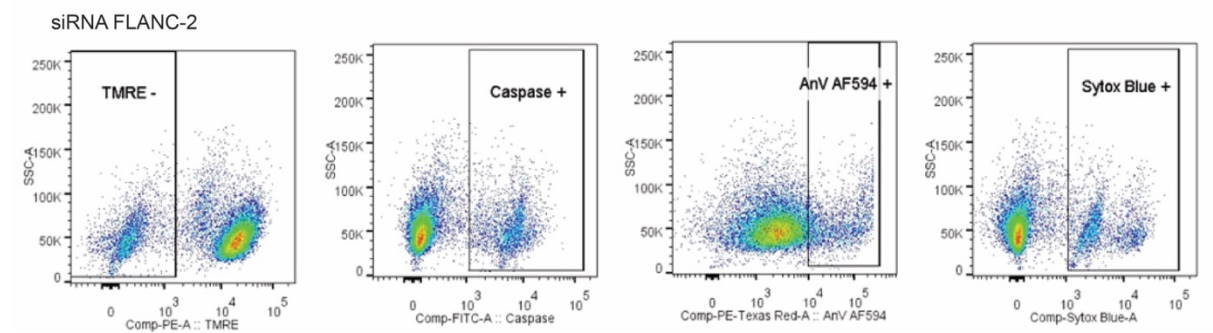



# Supplementary Figure 9

A

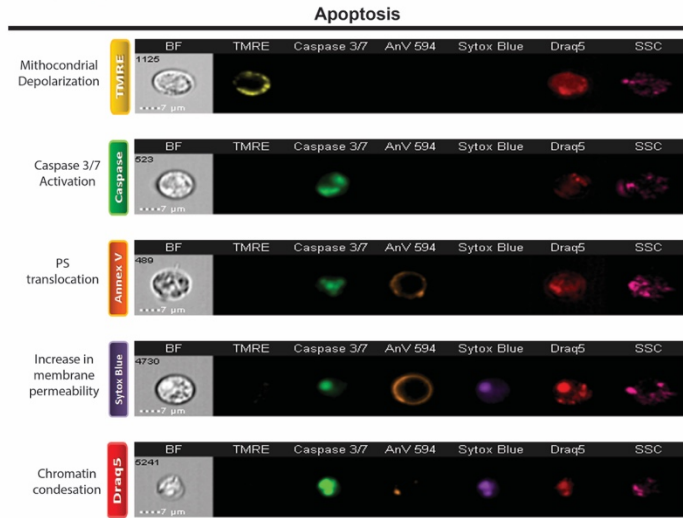

B

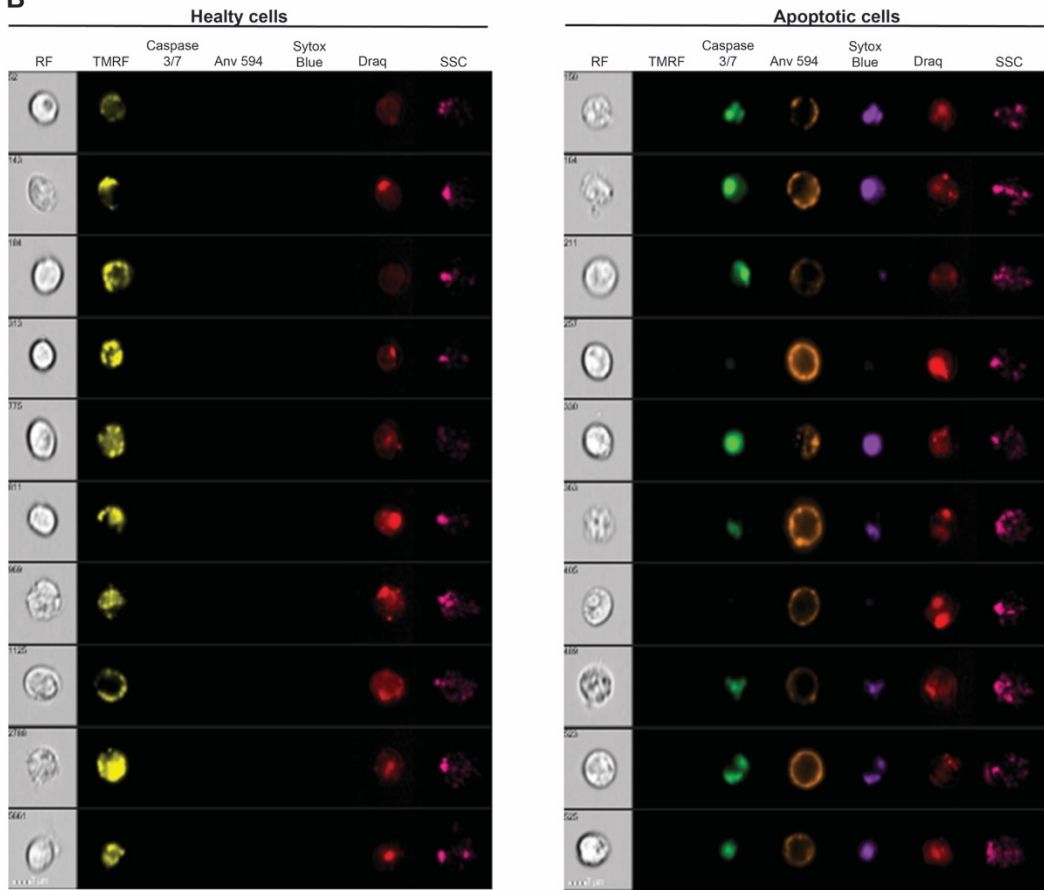

# Supplementary Figure 10

## A

siRNA Control

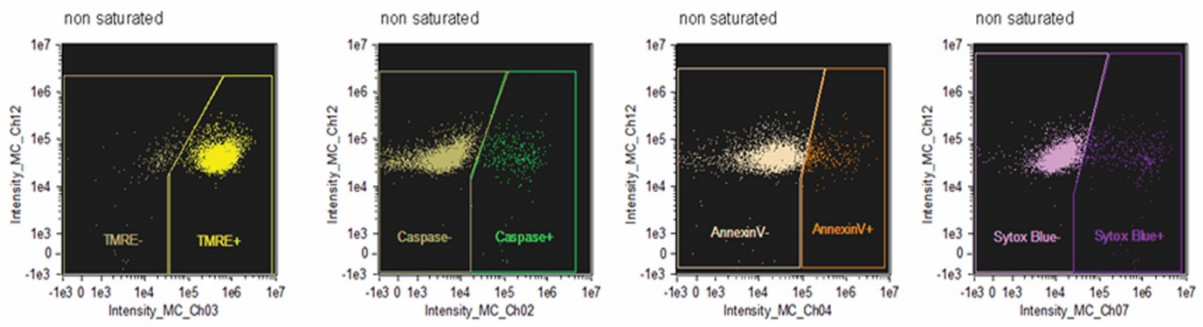

## B

siRNA FLANC-1

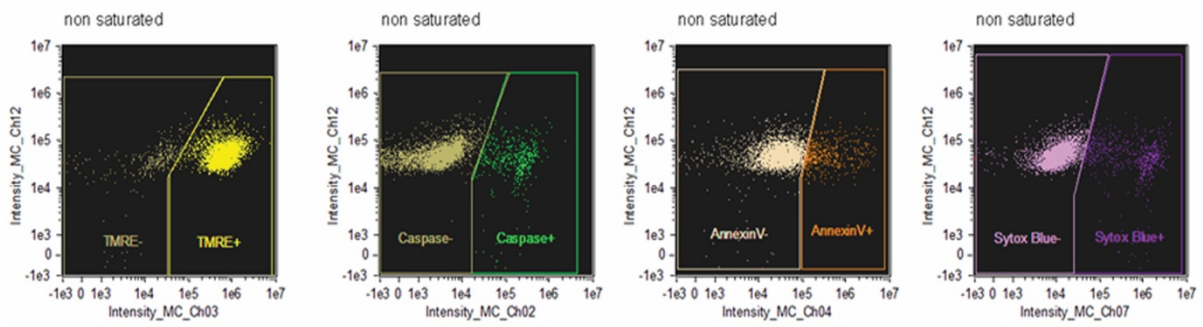

## C

siRNA FLANC-2

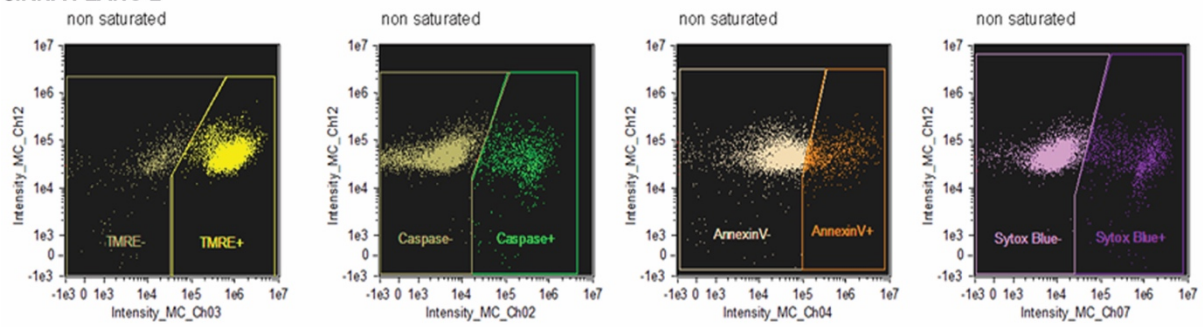

### Supplementary Figure 11

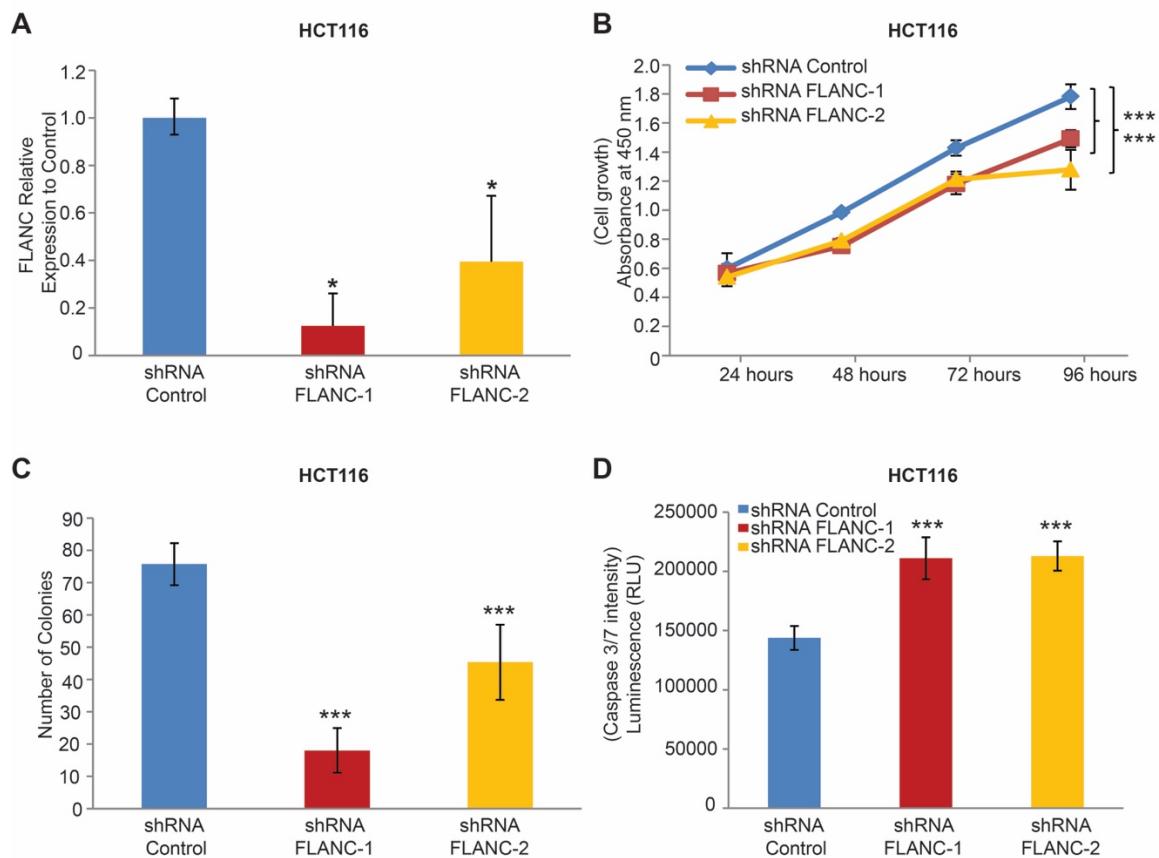

## Supplementary Figure 12

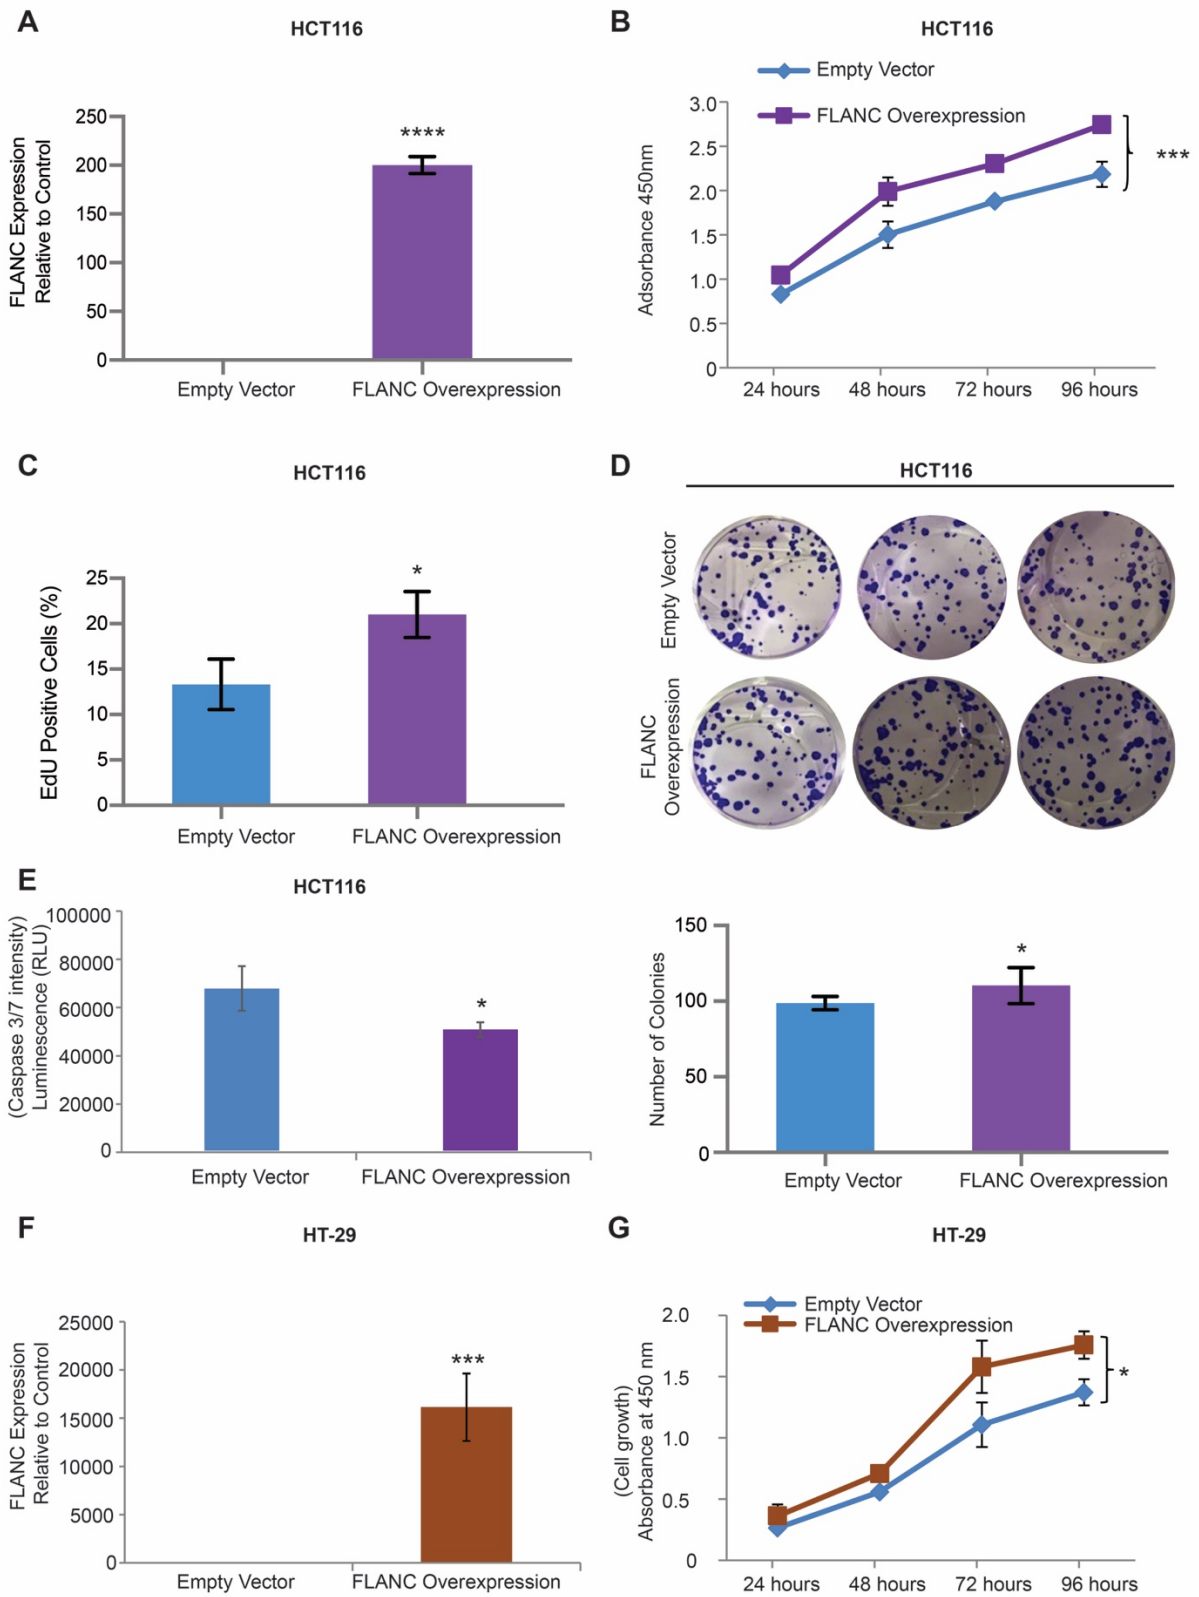

### Supplementary Figure 13

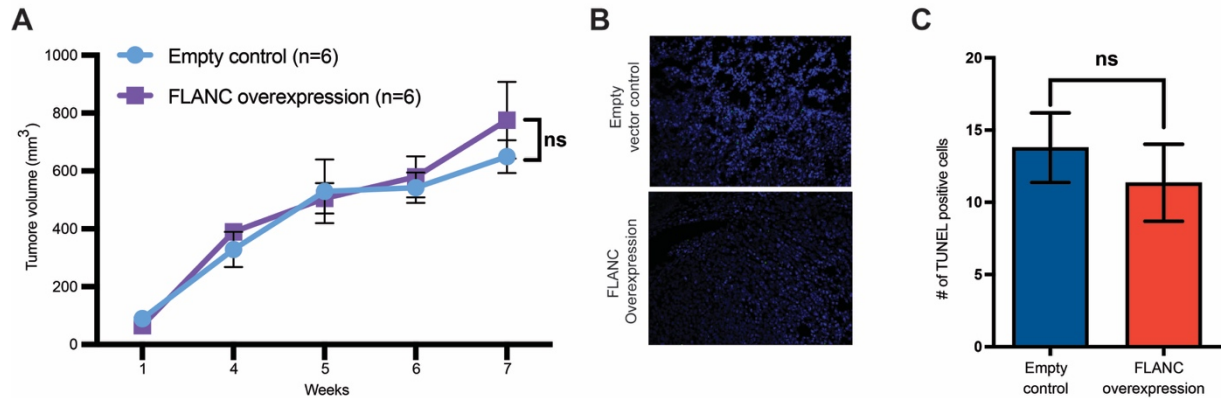



# Supplementary Figure 14

**A**

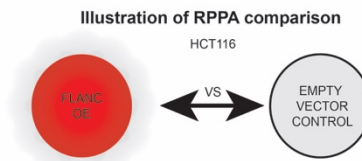

**B**

**FLANC stimulated pathways at protein level**

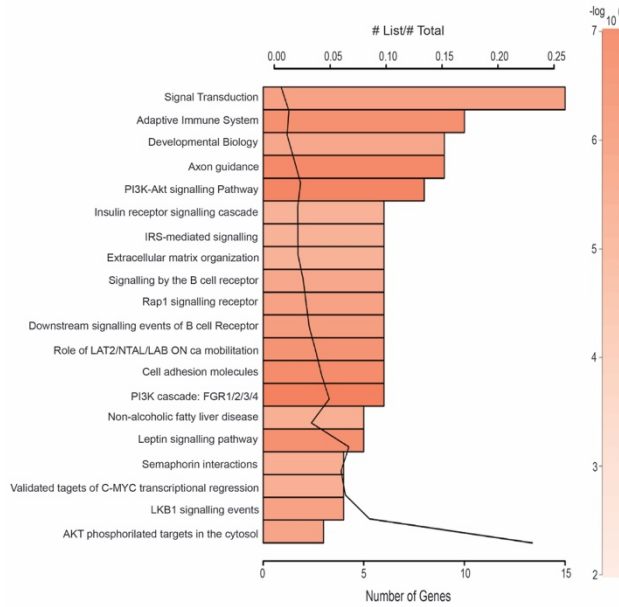

**C**

**FLANC inhibited pathways at protein level**

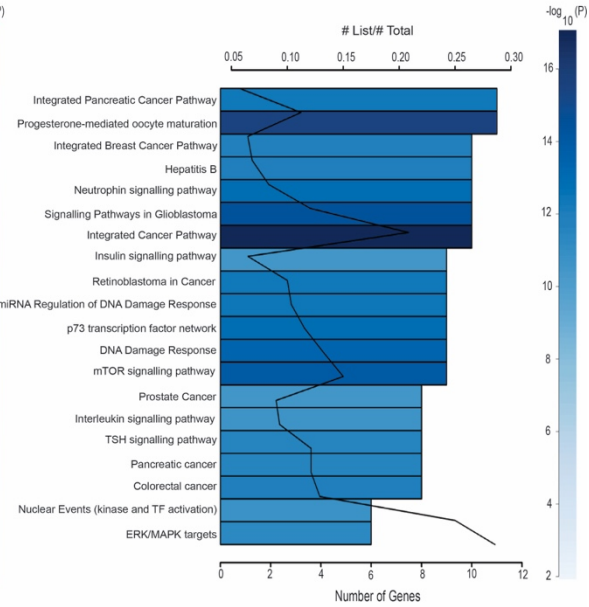

**D**

**The protein network regulated by FLANC**

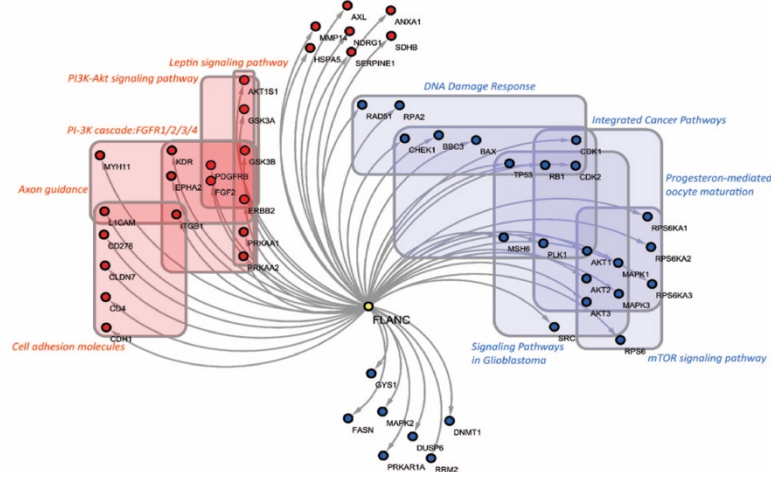

## Supplementary Figure 15

**A**

### Pathways regulated by FLANC at transcriptional and protein level

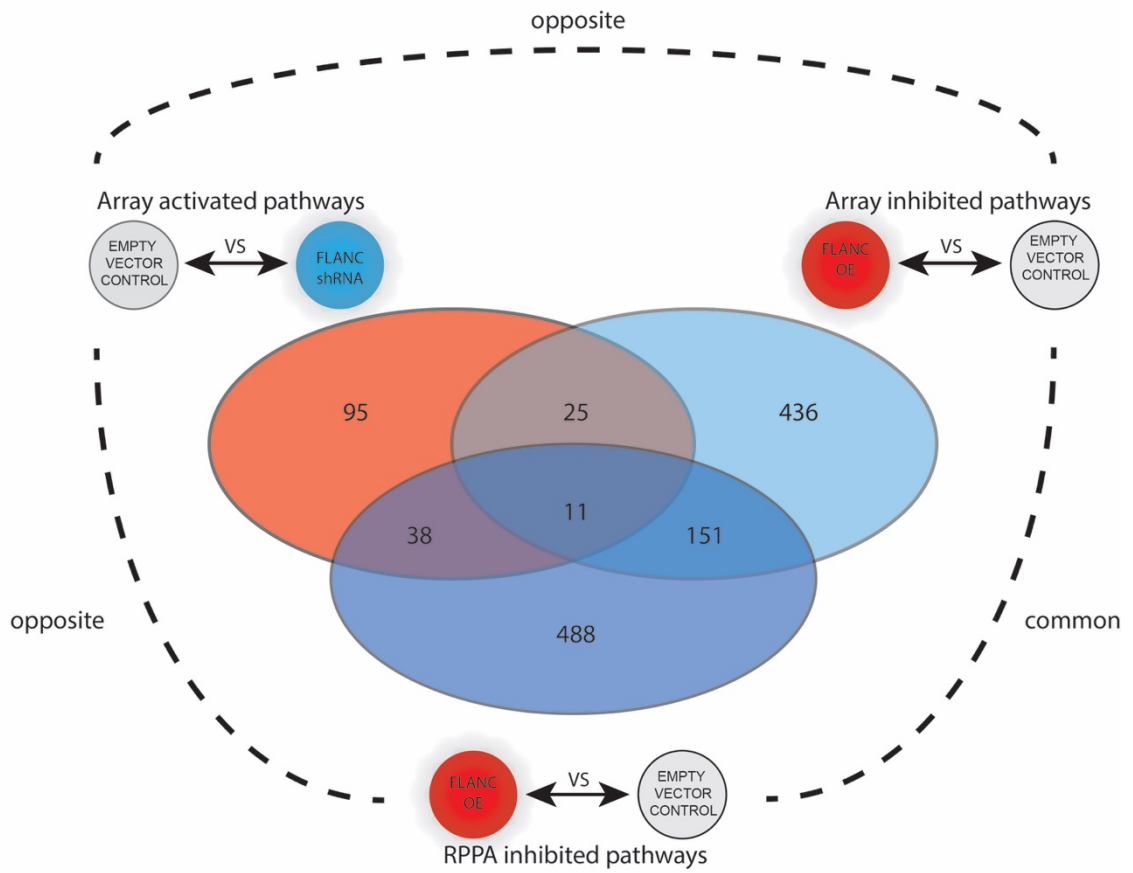

**B**

### Pathways confirmed by array and RPPA to be inhibited by FLANC

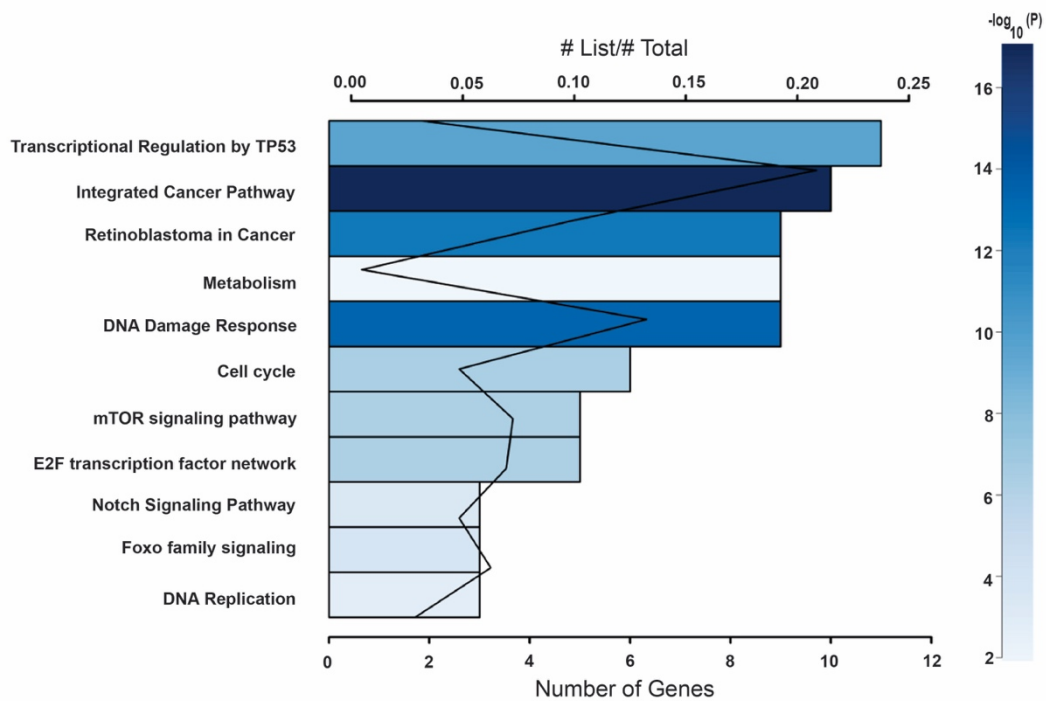

## Supplementary Figure 16

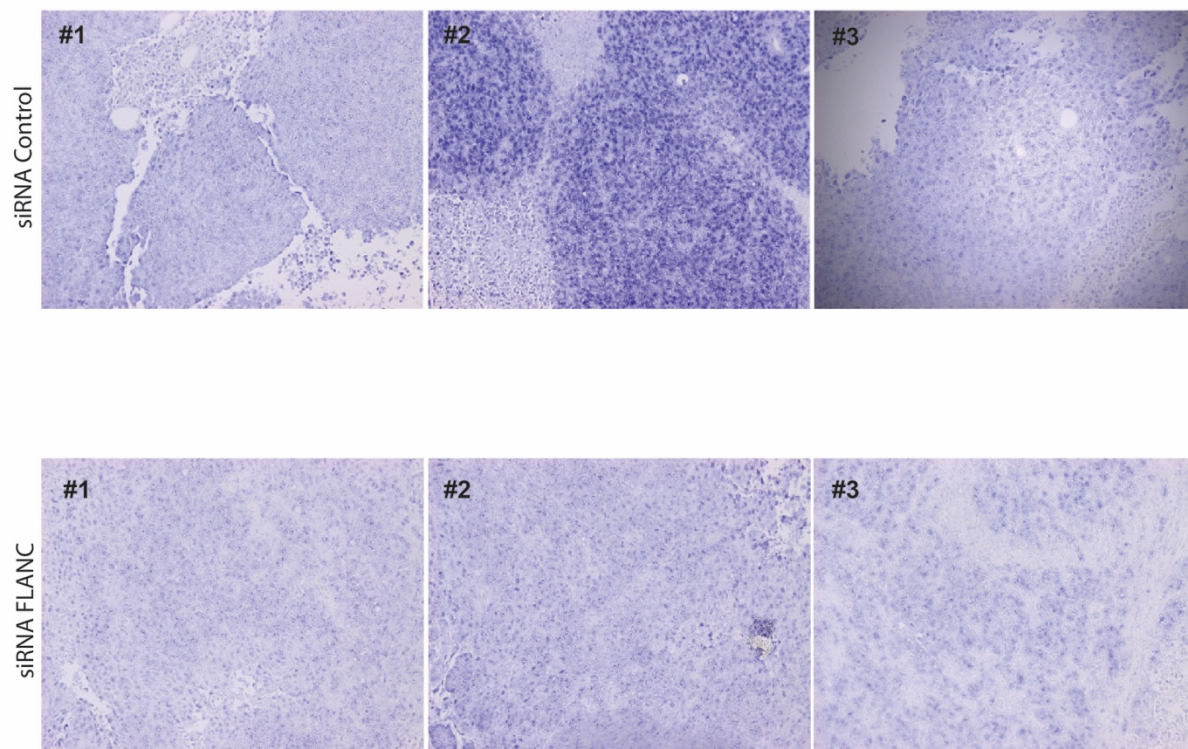

# Supplementary Figure 17

**A**

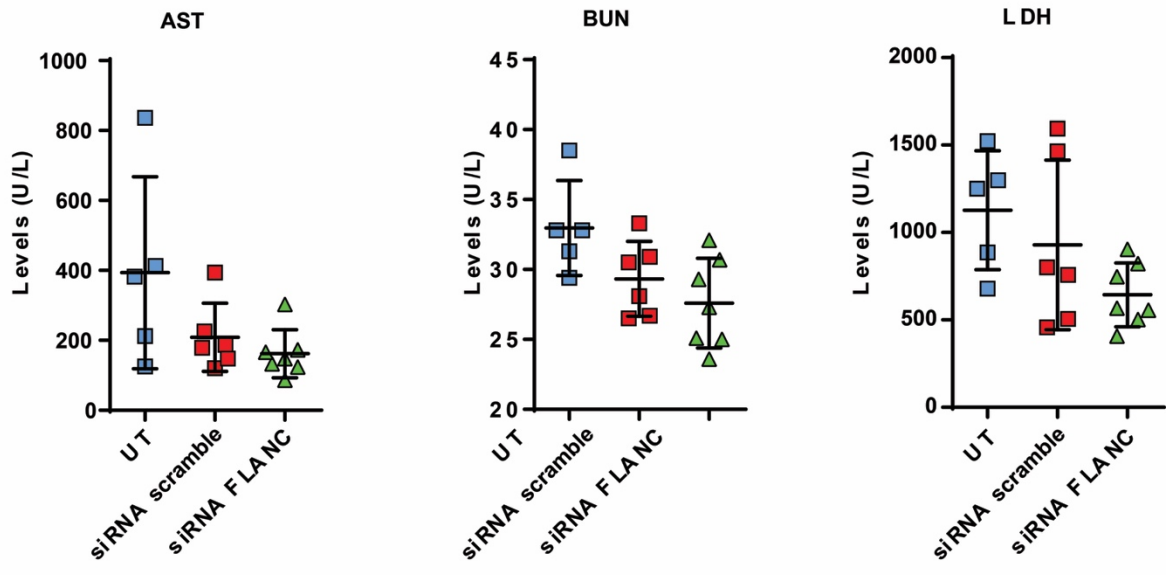

**B**

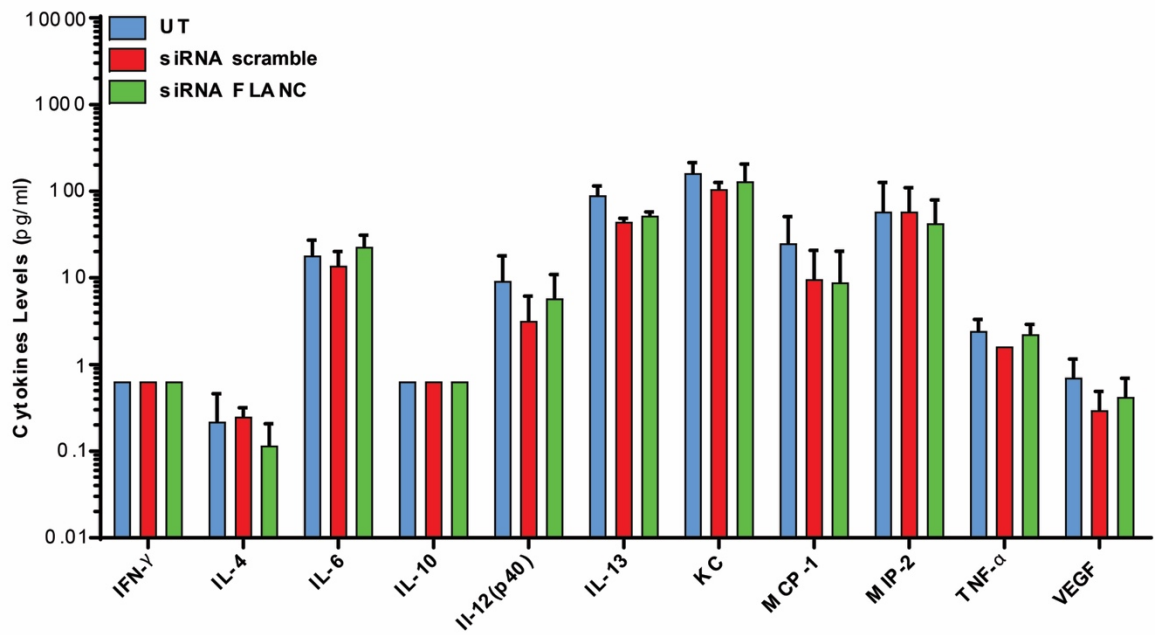

## Supplementary Figure 18

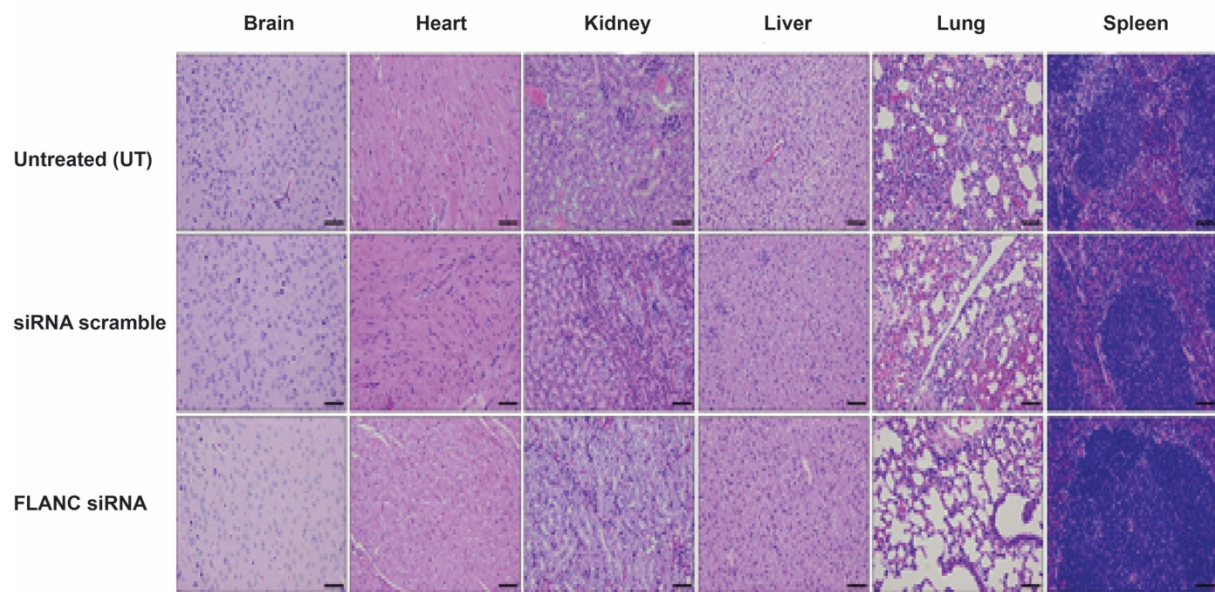

Supplement: NIHMS1594904-supplement-Supp2.pdf [file NIHMS1594904-supplement-Supp2.pdf]
